# Supplementary material for: Two-/three-dimensional open lanthanide–organic frameworks containing rigid/flexible dicarboxylate ligands: synthesis, crystal structure and photoluminescent properties
Source: Royal Society of Chemistry journal article supplement (doi:10.1039/c3ce26684b), 2013-01-01
Supplement: c3ce26684b.pdf [file c3ce26684b.pdf]

**Table S1** Selected bond lengths (Å) for complexes **1–11**

|            | <b>1</b> | <b>2</b> | <b>3</b> | <b>4</b> | <b>5</b> | <b>6</b> | <b>7</b> | <b>8</b> | <b>9</b> | <b>10</b> | <b>11</b> |
|------------|----------|----------|----------|----------|----------|----------|----------|----------|----------|-----------|-----------|
| Ln(1)–O(1) | 2.486(2) | 2.523(3) | 2.469(3) | 2.481(2) | 2.467(3) | 2.458(3) | 2.446(3) | 2.385(3) | 2.382(3) | 2.365(3)  | 2.383(5)  |
| Ln(1)–O(2) | 2.532(2) | 2.479(3) | 2.491(3) | 2.496(3) | 2.465(3) | 2.459(3) | 2.450(4) | 2.387(3) | 2.374(3) | 2.374(3)  | 2.399(5)  |
| Ln(1)–O(3) | 2.492(2) | 2.523(3) | 2.514(3) | 2.443(2) | 2.422(3) | 2.405(3) | 2.477(4) | 2.436(3) | 2.464(3) | 2.424(3)  | 2.357(4)  |
| Ln(1)–O(4) | 2.541(2) | 2.583(3) | 2.504(3) | 2.424(2) | 2.413(3) | 2.417(2) | 2.443(3) | 2.437(3) | 2.420(3) | 2.406(3)  | 2.345(4)  |
| Ln(1)–O(5) | 2.597(2) | 2.519(3) | 2.448(3) | 2.484(2) | 2.469(3) | 2.461(3) | 2.399(3) | 2.467(3) | 2.430(3) | 2.411(3)  | 2.353(6)  |
| Ln(1)–O(6) | 2.537(2) | 2.471(3) | 2.469(3) | 2.475(2) | 2.426(3) | 2.418(3) | 2.454(3) | 2.428(3) | 2.421(3) | 2.455(3)  | 2.439(6)  |
| Ln(1)–O(7) | 2.572(2) | 2.505(3) | 2.511(3) | 2.472(2) | 2.486(3) | 2.459(3) | 2.404(3) | 2.448(3) | 2.384(3) | 2.448(4)  | 2.448(5)  |
| Ln(1)–O(8) | 2.520(2) | 2.548(3) | 2.495(3) | 2.438(3) | 2.464(3) | 2.484(3) | 2.398(3) | 2.390(3) | 2.445(4) | 2.372(4)  | 2.395(5)  |
| Ln(1)–O(9) | 2.513(2) | 2.488(3) | 2.550(4) | 2.515(3) | 2.488(4) | 2.486(3) | 2.468(4) | 2.450(3) | 2.443(4) | 2.421(4)  | 2.405(6)  |

**Table S2** Selected bond lengths (Å) for complexes **12–16**

|                 | <b>12</b> | <b>13</b> | <b>14</b> | <b>15</b> | <b>16</b> |
|-----------------|-----------|-----------|-----------|-----------|-----------|
| Ln(1)–O(3)      | 2.340(4)  | 2.328(4)  | 2.348(5)  | 2.363(8)  | 2.359(5)  |
| Ln(1)–O(2)(4)   | 2.360(4)  | 2.396(5)  | 2.383(5)  | 2.325(8)  | 2.320(5)  |
| Ln(1)–O(1)#1    | 2.395(4)  | 2.349(5)  | 2.325(4)  | 2.297(7)  | 2.293(4)  |
| Ln(1)–O(9)      | 2.406(5)  | 2.401(5)  | 2.392(5)  | 2.369(9)  | 2.360(5)  |
| Ln(1)–O(10)     | 2.412(5)  | 2.408(6)  | 2.387(5)  | 2.373(8)  | 2.352(5)  |
| Ln(1)–N(4)(3)   | 2.431(4)  | 2.424(5)  | 2.423(5)  | 2.405(9)  | 2.387(6)  |
| Ln(1)–N(1)#2    | 2.596(5)  | 2.591(5)  | 2.576(5)  | 2.566(10) | 2.558(5)  |
| Ln(1)–O(5)(7)   | 2.641(3)  | 2.635(4)  | 2.629(4)  | 2.631(7)  | 2.611(4)  |
| Ln(2)–O(7)#3    | 2.361(4)  | 2.705(4)  | 2.344(4)  | 2.335(8)  | 2.437(5)  |
| Ln(2)–O(4)(2)   | 2.402(4)  | 2.392(4)  | 2.396(4)  | 2.357(7)  | 2.356(4)  |
| Ln(2)–O(11)     | 2.464(5)  | 2.453(5)  | 2.437(5)  | 2.415(9)  | 2.410(5)  |
| Ln(2)–O(8)      | 2.485(4)  | 2.509(4)  | 2.467(4)  | 2.445(8)  | 2.314(5)  |
| Ln(2)–O(6)      | 2.517(4)  | 2.347(4)  | 2.497(4)  | 2.480(8)  | 2.463(5)  |
| Ln(2)–N(3)(4)   | 2.528(5)  | 2.520(6)  | 2.509(5)  | 2.501(10) | 2.480(6)  |
| Ln(2)–O(6)#4(8) | 2.547(3)  | 2.527(4)  | 2.528(4)  | 2.518(7)  | 2.520(4)  |
| Ln(2)–N(2)      | 2.548(5)  | 2.531(5)  | 2.520(5)  | 2.514(10) | 2.483(5)  |
| Ln(2)–O(5)      | 2.715(4)  | 2.466(5)  | 2.710(4)  | 2.697(7)  | 2.709(4)  |

**Table S3** Important hydrogen bond interactions in complexes **1–11**<sup>#</sup>

| D–H...A                     | D–H / Å | H...A / Å | D...A / Å | <D–H...A / ° |
|-----------------------------|---------|-----------|-----------|--------------|
| <b>1</b>                    |         |           |           |              |
| O7–H7A...O8 <sup>a</sup>    | 0.820   | 2.229     | 164.94    | 3.028        |
| O8–H8A...O6 <sup>b</sup>    | 0.820   | 1.940     | 154.73    | 2.704        |
| O9–H9C...O4 <sup>c</sup>    | 0.850   | 2.306     | 119.07    | 2.819        |
| O9–H9C...O3 <sup>d</sup>    | 0.850   | 2.553     | 134.28    | 3.205        |
| OW2–HW2A...OW1              | 0.850   | 1.939     | 141.50    | 2.657        |
| OW2–HW2A...OW1 <sup>e</sup> | 0.850   | 2.083     | 152.50    | 2.864        |
| OW2–HW2B...O7 <sup>f</sup>  | 0.850   | 2.110     | 160.61    | 2.925        |
| OW1–HW1A...OW2 <sup>e</sup> | 0.850   | 2.250     | 129.26    | 2.864        |
| <b>2</b>                    |         |           |           |              |
| O7–H7C...O3 <sup>g</sup>    | 0.850   | 1.918     | 151.65    | 2.697        |
| O8–H8A...OW1                | 0.820   | 2.059     | 168.63    | 2.868        |
| O8–H8A...O7 <sup>a</sup>    | 0.820   | 2.615     | 111.73    | 3.017        |
| O8–H8B...O4 <sup>a</sup>    | 0.850   | 2.037     | 167.70    | 2.873        |
| O9–H9A...O1 <sup>h</sup>    | 0.820   | 2.169     | 137.08    | 2.826        |
| O9–H9C...O2 <sup>d</sup>    | 0.850   | 2.652     | 123.30    | 3.199        |
| OW1–HW1B...O7 <sup>a</sup>  | 0.850   | 2.299     | 132.01    | 2.937        |
| OW1–HW1C...OW2 <sup>i</sup> | 0.850   | 1.409     | 125.86    | 2.028        |
| OW2–HW2A...OW2 <sup>j</sup> | 0.850   | 1.340     | 149.10    | 2.115        |
| OW2–HW2A...OW1 <sup>k</sup> | 0.850   | 1.420     | 124.66    | 2.028        |
| OW3–HW3B...OW2 <sup>a</sup> | 0.850   | 2.284     | 144.78    | 3.019        |
| OW3–HW3C...O8 <sup>i</sup>  | 0.850   | 2.204     | 140.54    | 2.911        |
| <b>3</b>                    |         |           |           |              |
| O9–H9B...OW1 <sup>l</sup>   | 0.850   | 2.099     | 136.19    | 2.776        |
| O9–H9C...OW1 <sup>m</sup>   | 0.850   | 2.284     | 125.36    | 2.861        |
| OW1–HW1B...O4 <sup>n</sup>  | 0.850   | 2.358     | 139.04    | 3.051        |
| OW1–HW1C...OW3 <sup>o</sup> | 0.850   | 2.609     | 143.96    | 3.334        |
| OW1–HW1C...O3 <sup>o</sup>  | 0.850   | 2.640     | 112.84    | 3.072        |
| OW2–HW2B...OW1 <sup>m</sup> | 0.850   | 2.316     | 153.34    | 3.099        |
| OW2–HW2B...OW3 <sup>p</sup> | 0.850   | 2.383     | 114.43    | 2.842        |
| OW2–HW2C...O8               | 0.850   | 2.097     | 146.37    | 2.844        |
| OW3–HW3A...OW2 <sup>q</sup> | 0.850   | 2.163     | 136.66    | 2.842        |
| OW3–HW3B...O7 <sup>l</sup>  | 0.850   | 2.192     | 157.27    | 2.994        |
| <b>4</b>                    |         |           |           |              |
| O9–H9A...OW1 <sup>m</sup>   | 0.850   | 2.460     | 111.04    | 2.877        |
| O9–H9C...OW1 <sup>l</sup>   | 0.850   | 2.204     | 122.83    | 2.759        |
| OW1–HW1A...O2 <sup>o</sup>  | 0.850   | 2.237     | 156.23    | 3.035        |
| OW1–HW1A...O1 <sup>n</sup>  | 0.850   | 2.373     | 138.54    | 3.062        |
| OW1–HW1B...OW2 <sup>o</sup> | 0.850   | 2.389     | 132.38    | 3.028        |
| OW1–HW1B...O4 <sup>r</sup>  | 0.850   | 2.654     | 148.39    | 3.407        |
| OW2–HW2A...O6 <sup>q</sup>  | 0.850   | 2.038     | 157.09    | 2.840        |
| OW2–HW2B...OW2 <sup>s</sup> | 0.850   | 2.623     | 150.83    | 3.391        |

|                              |       |       |        |       |
|------------------------------|-------|-------|--------|-------|
| OW3–HW3A...OW2               | 0.850 | 2.135 | 136.40 | 2.812 |
| OW3–HW3B...O5 <sup>l</sup>   | 0.850 | 2.169 | 157.43 | 2.972 |
| <b>5</b>                     |       |       |        |       |
| O9–H9C...OW2                 | 0.850 | 2.316 | 122.21 | 2.861 |
| OW1–HW1A...O2 <sup>t</sup>   | 0.850 | 2.430 | 121.11 | 2.960 |
| OW2–HW2B...OW3               | 0.850 | 2.486 | 121.73 | 3.020 |
| OW3–HW3A...O1                | 0.850 | 2.227 | 126.92 | 2.821 |
| OW3–HW3B...OW1               | 0.850 | 1.967 | 166.36 | 2.800 |
| <b>6</b>                     |       |       |        |       |
| O9–H9B...OW3 <sup>j</sup>    | 0.850 | 2.276 | 124.73 | 2.847 |
| O9–H9C...OW3                 | 0.850 | 2.073 | 137.06 | 2.757 |
| OW1–HW1B...O2 <sup>j</sup>   | 0.850 | 2.070 | 147.21 | 2.822 |
| OW1–HW1B...O3 <sup>j</sup>   | 0.850 | 2.540 | 132.43 | 3.176 |
| OW1–HW1C...OW2 <sup>u</sup>  | 0.850 | 2.000 | 161.07 | 2.818 |
| OW2–HW2B...O1 <sup>l</sup>   | 0.850 | 2.129 | 165.94 | 2.961 |
| OW3–HW3A...O8 <sup>u</sup>   | 0.850 | 2.288 | 140.37 | 2.992 |
| OW3–HW3A...O7 <sup>p</sup>   | 0.850 | 2.347 | 147.41 | 3.097 |
| OW3–HW3B...OW2 <sup>u</sup>  | 0.850 | 2.478 | 157.10 | 3.278 |
| <b>7</b>                     |       |       |        |       |
| O9–H9B...OW3 <sup>v</sup>    | 0.850 | 2.292 | 124.73 | 2.863 |
| O9–H9C...OW3                 | 0.850 | 2.071 | 136.94 | 2.754 |
| OW1–HW1C...O1 <sup>w</sup>   | 0.850 | 2.233 | 142.43 | 2.953 |
| OW2–HW2B...O8 <sup>x</sup>   | 0.850 | 2.322 | 167.84 | 3.158 |
| OW2–HW2C...OW2 <sup>y</sup>  | 0.850 | 2.542 | 151.47 | 3.313 |
| OW3–HW3A...O3 <sup>z</sup>   | 0.850 | 2.220 | 147.05 | 2.969 |
| OW3–HW3A...O4 <sup>o</sup>   | 0.850 | 2.319 | 153.86 | 3.104 |
| OW3–HW3B...OW1 <sup>z</sup>  | 0.850 | 2.457 | 157.13 | 3.257 |
| OW3–HW3B...OW2 <sup>aa</sup> | 0.850 | 2.462 | 121.62 | 2.997 |
| <b>8</b>                     |       |       |        |       |
| O9–H9B...OW1                 | 0.850 | 2.289 | 124.52 | 2.858 |
| O9–H9C...OW1 <sup>l</sup>    | 0.850 | 2.062 | 137.18 | 2.747 |
| OW1–HW1A...O5 <sup>x</sup>   | 0.850 | 2.109 | 172.92 | 2.954 |
| OW1–HW1A...O6 <sup>bb</sup>  | 0.850 | 2.600 | 119.86 | 3.112 |
| OW1–HW1B...OW2               | 0.850 | 2.349 | 130.18 | 2.969 |
| OW1–HW1B...OW3 <sup>q</sup>  | 0.850 | 2.568 | 139.90 | 3.264 |
| OW2–HW2A...OW1               | 0.850 | 2.330 | 132.24 | 2.969 |
| OW2–HW2A...O1                | 0.850 | 2.598 | 123.08 | 3.144 |
| OW2–HW2B...O4                | 0.850 | 2.286 | 122.83 | 2.838 |
| OW3–HW3B...OW1 <sup>p</sup>  | 0.850 | 2.547 | 142.75 | 3.264 |
| <b>9</b>                     |       |       |        |       |
| O9–H9B...OW3                 | 0.850 | 2.059 | 136.73 | 2.741 |
| O9–H9C...OW3 <sup>l</sup>    | 0.850 | 2.294 | 124.16 | 2.859 |
| OW1–HW1B...O5                | 0.850 | 2.073 | 148.77 | 2.835 |
| OW1–HW1C...OW1 <sup>w</sup>  | 0.850 | 2.553 | 157.40 | 3.354 |

|                              |       |       |        |       |
|------------------------------|-------|-------|--------|-------|
| OW2–HW2A...O6 <sup>cc</sup>  | 0.850 | 2.379 | 121.69 | 2.916 |
| OW3–HW3B...OW1 <sup>l</sup>  | 0.850 | 2.398 | 120.22 | 2.920 |
| OW3–HW3B...OW2               | 0.850 | 2.462 | 157.26 | 3.263 |
| OW3–HW3C...O3 <sup>bb</sup>  | 0.850 | 2.186 | 147.95 | 2.942 |
| OW3–HW3C...O4 <sup>x</sup>   | 0.850 | 2.342 | 152.56 | 3.122 |
| <b>10</b>                    |       |       |        |       |
| O9–H9B...OW1                 | 0.850 | 2.272 | 125.55 | 2.851 |
| O9–H9C...OW1 <sup>dd</sup>   | 0.850 | 2.082 | 137.15 | 2.766 |
| OW1–HW1A...O5 <sup>u</sup>   | 0.850 | 2.365 | 156.42 | 3.163 |
| OW1–HW1A...O6 <sup>q</sup>   | 0.850 | 2.503 | 113.05 | 2.942 |
| OW1–HW1B...OW3 <sup>ee</sup> | 0.850 | 2.422 | 151.33 | 3.193 |
| OW2–HW2A...OW1               | 0.850 | 2.236 | 140.69 | 2.943 |
| OW2–HW2A...O2                | 0.850 | 2.546 | 125.16 | 3.114 |
| OW2–HW2B...O3                | 0.850 | 2.194 | 131.97 | 2.834 |
| OW3–HW3B...O1 <sup>ff</sup>  | 0.850 | 2.370 | 118.40 | 2.874 |
| <b>11</b>                    |       |       |        |       |
| O9–H9A...OW2 <sup>gg</sup>   | 0.820 | 2.296 | 127.13 | 2.866 |
| OW1–HW1B...O1 <sup>hh</sup>  | 0.850 | 2.306 | 132.60 | 2.948 |
| OW2–HW2A...OW1 <sup>ii</sup> | 0.850 | 2.373 | 153.55 | 3.157 |
| OW2–HW2C...O7 <sup>ii</sup>  | 0.850 | 2.225 | 140.86 | 2.934 |
| OW2–HW2C...O8 <sup>o</sup>   | 0.850 | 2.484 | 140.06 | 3.183 |
| OW3–HW3D...O2                | 0.850 | 2.082 | 148.03 | 2.839 |
| OW3–HW3A...OW1 <sup>x</sup>  | 0.850 | 2.213 | 116.68 | 2.704 |
| OW3–HW3A...OW2 <sup>gg</sup> | 0.850 | 2.218 | 149.79 | 2.983 |

<sup>#</sup> Symmetry transformations used to generate equivalent atoms: (a)  $x, -y+1/2, z+1/2$ ; (b)  $-x+2, y+1/2, -z+3/2$ ; (c)  $-x+2, y-1/2, -z+3/2$ ; (d)  $x, -y-1/2, z-1/2$ ; (e)  $-x+1, -y, -z+2$ ; (f)  $-x+1, y-1/2, -z+3/2$ ; (g)  $-x+1, y+1/2, -z+1/2$ ; (h)  $-x+1, y-1/2, -z+1/2$ ; (i)  $-x, y-1/2, -z+1/2$ ; (j)  $-x, -y+1, -z$ ; (k)  $-x, y+1/2, -z+1/2$ ; (l)  $-x, -y+1, -z+1$ ; (m)  $x, y, z-1$ ; (n)  $x-1/2, -y+1/2, z+1/2$ ; (o)  $-x+1/2, y-1/2, -z+3/2$ ; (p)  $-x+1/2, y-1/2, -z+1/2$ ; (q)  $-x+1/2, y+1/2, -z+1/2$ ; (r)  $x, y, z+1$ ; (s)  $-x, -y+2, -z+1$ ; (t)  $x+1/2, -y+3/2, z-1/2$ ; (u)  $x-1/2, -y+1/2, z-1/2$ ; (v)  $-x+1, -y+1, -z+2$ ; (w)  $-x+1, -y+1, -z+1$ ; (x)  $-x+1/2, y+1/2, -z+3/2$ ; (y)  $-x+1, -y+2, -z+1$ ; (z)  $x+1/2, -y+1/2, z+1/2$ ; (aa)  $x+1/2, -y+3/2, z+1/2$ ; (bb)  $x-1/2, -y+3/2, z-1/2$ ; (cc)  $-x, -y+1, -z+2$ ; (dd)  $-x, -y, -z$ ; (ee)  $-x+1, -y, -z$ ; (ff)  $x+1/2, -y-1/2, z-1/2$ ; (gg)  $-x, -y, -z+1$ ; (hh)  $-x, -y, -z+2$ ; (ii)  $x-1/2, -y-1/2, z-1/2$ .

**Table S4** Important hydrogen bond interactions in complexes **12–16**<sup>#</sup>

| D–H...A                     | D–H / Å | H...A / Å | D...A / Å | <D–H...A / ° |
|-----------------------------|---------|-----------|-----------|--------------|
| <b>12</b>                   |         |           |           |              |
| O9–H9B...O4                 | 0.820   | 2.256     | 119.72    | 2.756        |
| O9–H9B...O3 <sup>a</sup>    | 0.820   | 2.628     | 121.84    | 3.139        |
| O10–H10A...O8               | 0.820   | 1.954     | 147.52    | 2.682        |
| O11–H11A...OW2 <sup>b</sup> | 0.820   | 2.401     | 163.35    | 3.195        |
| O11–H11A...OW2 <sup>c</sup> | 0.820   | 2.559     | 117.64    | 3.028        |
| O11–H11B...N3 <sup>d</sup>  | 0.850   | 2.469     | 160.92    | 3.284        |
| OW1–HW1A...O10 <sup>b</sup> | 0.850   | 2.415     | 161.93    | 3.234        |
| OW1–HW1A...O2 <sup>b</sup>  | 0.850   | 2.560     | 116.15    | 3.032        |
| OW2–HW2B...O11 <sup>e</sup> | 0.850   | 2.401     | 131.04    | 3.028        |
| OW2–HW2C...O7 <sup>f</sup>  | 0.850   | 2.422     | 160.11    | 3.234        |
| OW3–HW3A...O9 <sup>e</sup>  | 0.850   | 2.135     | 123.95    | 2.704        |
| <b>13</b>                   |         |           |           |              |
| O9–H9B...O5                 | 0.960   | 2.030     | 121.21    | 2.658        |
| O10–H10A...O2 <sup>g</sup>  | 0.820   | 2.468     | 167.94    | 3.274        |
| O10–H10B...O4               | 0.960   | 1.820     | 164.54    | 2.757        |
| O10–H10B...O3 <sup>g</sup>  | 0.960   | 2.536     | 117.25    | 3.096        |
| O11–H11A...OW2 <sup>h</sup> | 0.820   | 2.326     | 167.78    | 3.132        |
| O11–H11A...OW2              | 0.820   | 2.435     | 115.95    | 2.889        |
| O11–H11B...N4 <sup>i</sup>  | 0.960   | 2.332     | 159.74    | 3.250        |
| OW1–HW1B...O10 <sup>h</sup> | 0.850   | 2.045     | 125.12    | 2.628        |
| OW2–HW2A...OW2 <sup>h</sup> | 0.850   | 1.395     | 141.35    | 2.126        |
| OW2–HW2A...OW2 <sup>j</sup> | 0.850   | 2.380     | 121.13    | 2.912        |
| OW2–HW2A...OW2 <sup>k</sup> | 0.850   | 2.502     | 110.64    | 2.912        |
| OW3–HW3A...O4 <sup>h</sup>  | 0.850   | 2.485     | 155.37    | 3.276        |
| <b>14</b>                   |         |           |           |              |
| O9–H9A...O4 <sup>l</sup>    | 0.850   | 2.457     | 161.35    | 3.274        |
| O9–H9B...O2 <sup>l</sup>    | 0.850   | 1.914     | 162.84    | 2.738        |
| O10–H10A...OW1 <sup>m</sup> | 0.850   | 2.544     | 145.17    | 3.278        |
| O10–H10B...O8               | 0.850   | 1.977     | 137.70    | 2.667        |
| O11–H11A...OW1              | 0.850   | 2.208     | 126.16    | 2.795        |
| O11–H11A...O5               | 0.850   | 2.620     | 113.26    | 3.057        |
| O11–H11B...OW2 <sup>n</sup> | 0.850   | 2.373     | 139.58    | 3.070        |
| OW1–HW1A...OW2              | 0.850   | 2.634     | 123.45    | 3.183        |
| OW1–HW1B...O2 <sup>o</sup>  | 0.850   | 2.564     | 140.75    | 3.267        |
| OW1–HW1B...O1 <sup>o</sup>  | 0.850   | 2.637     | 157.17    | 3.436        |
| OW2–HW2A...O7 <sup>n</sup>  | 0.850   | 2.576     | 133.77    | 3.223        |
| OW2–HW2A...OW1              | 0.850   | 2.653     | 121.67    | 3.183        |
| OW3–HW3A...O9 <sup>l</sup>  | 0.850   | 2.245     | 110.55    | 2.665        |
| <b>15</b>                   |         |           |           |              |
| O9–H9A...OW2                | 0.820   | 2.226     | 115.80    | 2.687        |
| O9–H9B...O2 <sup>o</sup>    | 0.960   | 2.175     | 116.19    | 2.737        |

|                             |       |       |             |       |
|-----------------------------|-------|-------|-------------|-------|
| O9–H9B...O1 <sup>o</sup>    | 0.960 | 2.548 | 118.37      | 3.120 |
| O11–H11A...OW1 <sup>p</sup> | 0.820 | 2.219 | 141.73      | 2.908 |
| O11–H11B...N3 <sup>p</sup>  | 0.960 | 2.286 | 160.59      | 3.207 |
| OW2–HW2A...O9 <sup>l</sup>  | 0.850 | 2.232 | 113.48      | 2.687 |
| OW2–HW2B...O9 <sup>n</sup>  | 0.850 | 2.145 | 121.28      | 2.687 |
| OW3–HW3B...O11 <sup>o</sup> | 0.850 | 2.323 | 113.93      | 2.778 |
| OW3–HW3B...O3 <sup>o</sup>  | 0.850 | 2.441 | 112.032.870 |       |
| <b>16</b>                   |       |       |             |       |
| O9–H9B...O7                 | 0.850 | 2.125 | 122.78      | 2.682 |
| O10–H10A...O3 <sup>q</sup>  | 0.820 | 2.478 | 166.54      | 3.281 |
| O10–H10B...O2               | 0.850 | 1.925 | 162.48      | 2.747 |
| O10–H10B...O1 <sup>q</sup>  | 0.850 | 2.647 | 117.20      | 3.128 |
| O11–H11B...N3 <sup>r</sup>  | 0.820 | 2.416 | 160.98      | 3.203 |
| O11–H11C...OW2              | 0.850 | 2.034 | 142.93      | 2.760 |
| OW1–HW1B...O10 <sup>q</sup> | 0.850 | 2.194 | 117.96      | 2.699 |
| OW2–HW2A...O2 <sup>h</sup>  | 0.850 | 2.518 | 154.41      | 3.305 |
| OW3–HW3B...O8 <sup>h</sup>  | 0.850 | 2.638 | 126.17      | 3.214 |
| OW3–HW3C...OW3 <sup>h</sup> | 0.850 | 1.404 | 114.26      | 1.917 |
| OW3–HW3C...O11 <sup>h</sup> | 0.850 | 2.407 | 137.93      | 3.091 |

<sup>#</sup> Symmetry transformations used to generate equivalent atoms: (a)  $x-1/4, -y+7/4, -z-1/4$ ; (b)  $x-1/4, -y+5/4, z-1/4$ ; (c)  $-x+7/4, y+3/4, z-1/4$ ; (d)  $-x+2, -y+1, -z-1$ ; (e)  $x-3/4, -y+7/4, z+1/4$ ; (f)  $-x+2, -y+1/2, z$ ; (g)  $-x+3/4, y-3/4, -z+3/4$ ; (h)  $-x, -y+3/2, z$ ; (i)  $-x, -y+2, -z$ ; (j)  $-x+3/4, y-3/4, -z-1/4$ ; (k)  $x+3/4, -y+3/4, -z-1/4$ ; (l)  $x+1/4, -y+5/4, -z+1/4$ ; (m)  $-x+5/4, y+1/4, z+1/4$ ; (n)  $-x+1, -y+3/2, z$ ; (o)  $y-1/4, -x+5/4, -z+1/4$ ; (p)  $-x+1/2, -y+3/2, -z-1/2$ ; (q)  $-y+3/4, x+3/4, -z+3/4$ ; (r)  $-x, -y+1, -z$ .

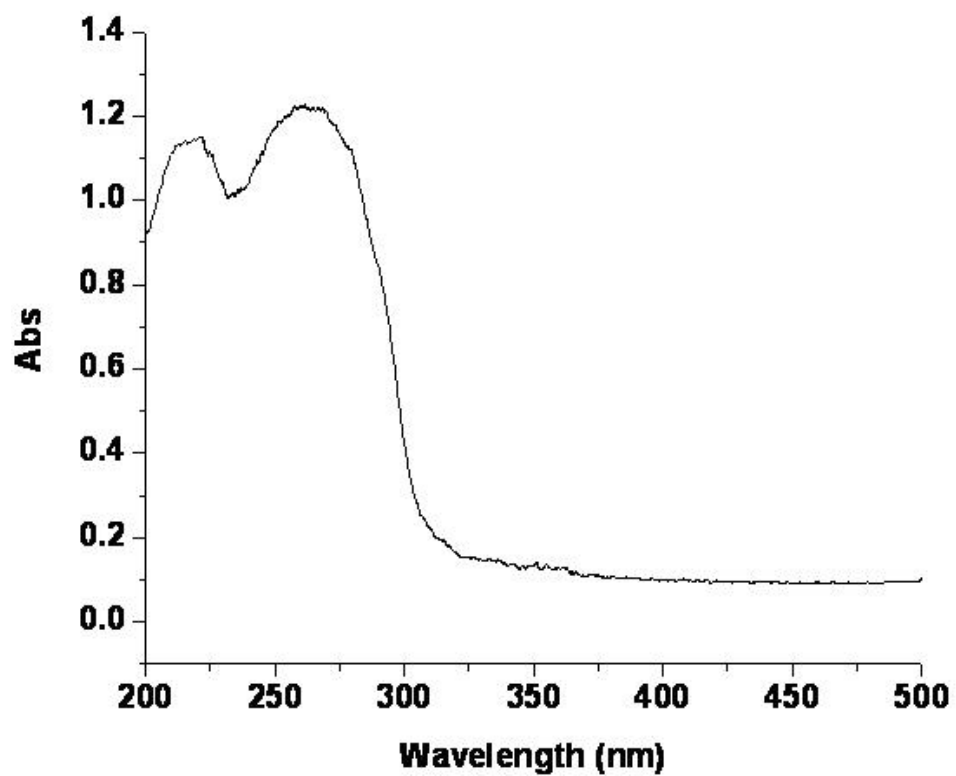

**Fig. S1** UV - Vis absorption spectrum of the oxalic acid ligand in solid-state.



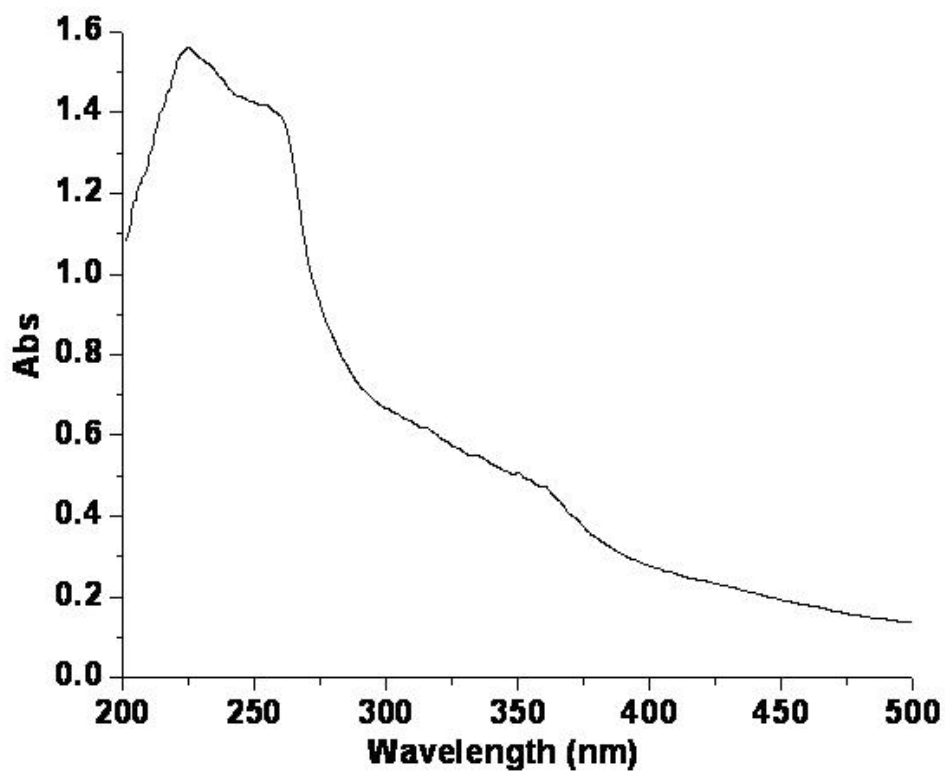

**Fig. S2** UV-Vis absorption spectrum of the imidazole-4,5-dicarboxylate ligand in solid-state.

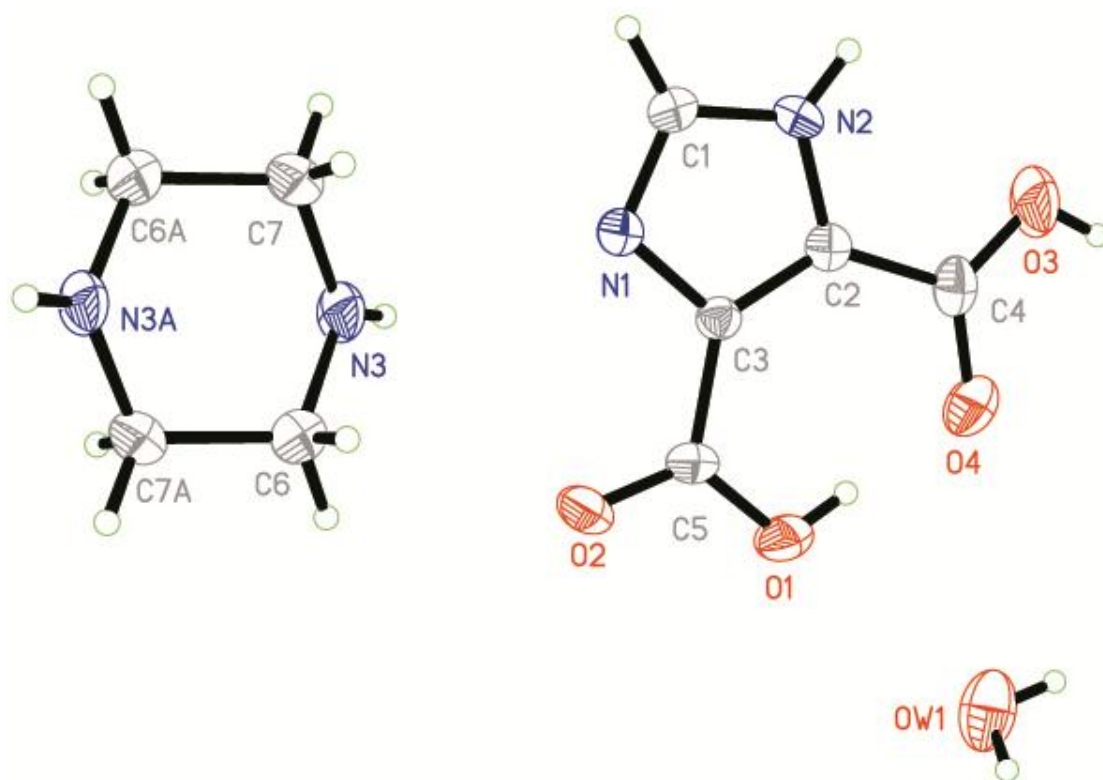

**Fig. S3** The structural unit of  $[(H_3IMDC)_2 \cdot (PZ)_{0.5} \cdot (H_2O)]$  with labeling scheme and 50% thermal ellipsoids.

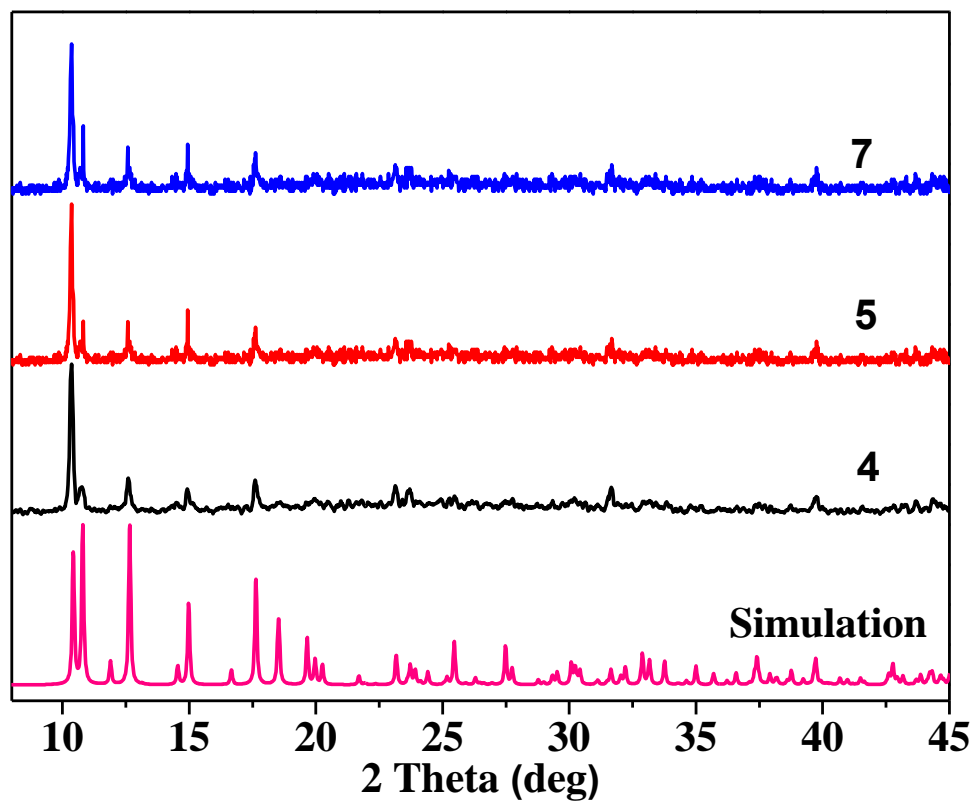

**Fig. S4** PXRD patterns of **4**, **5** and **7** compared with a simulated pattern.

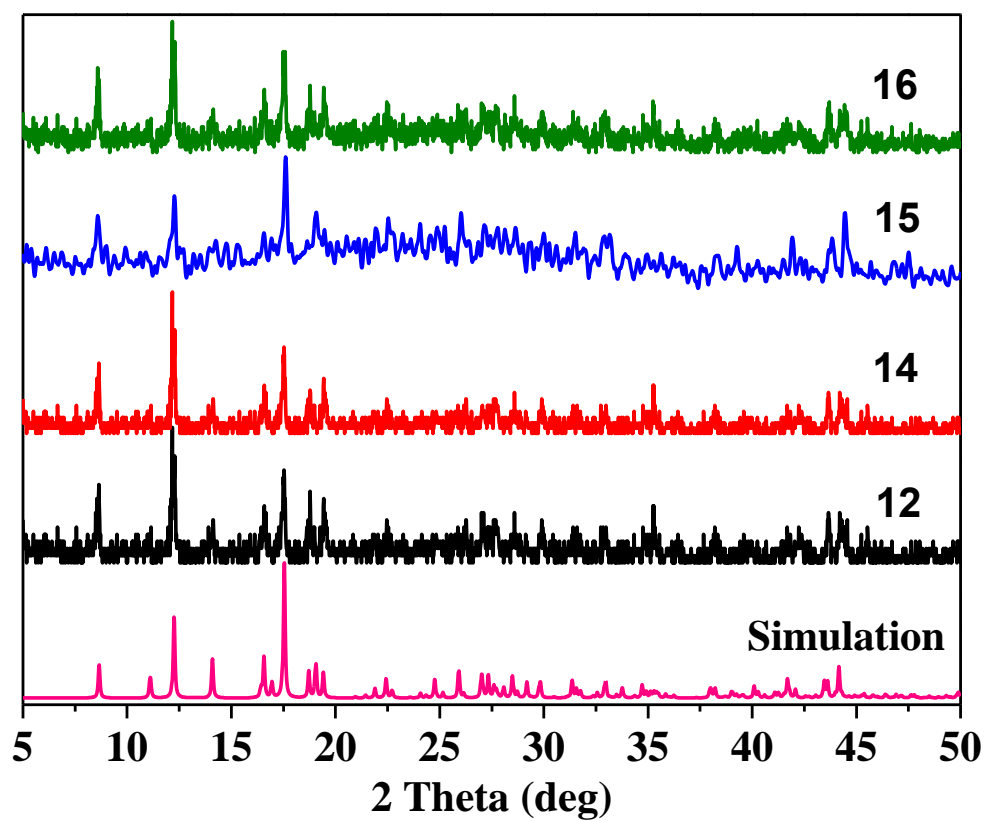

Fig. S5 PXR D patterns of 12, 14, 15 and 16 compared with a simulated pattern.

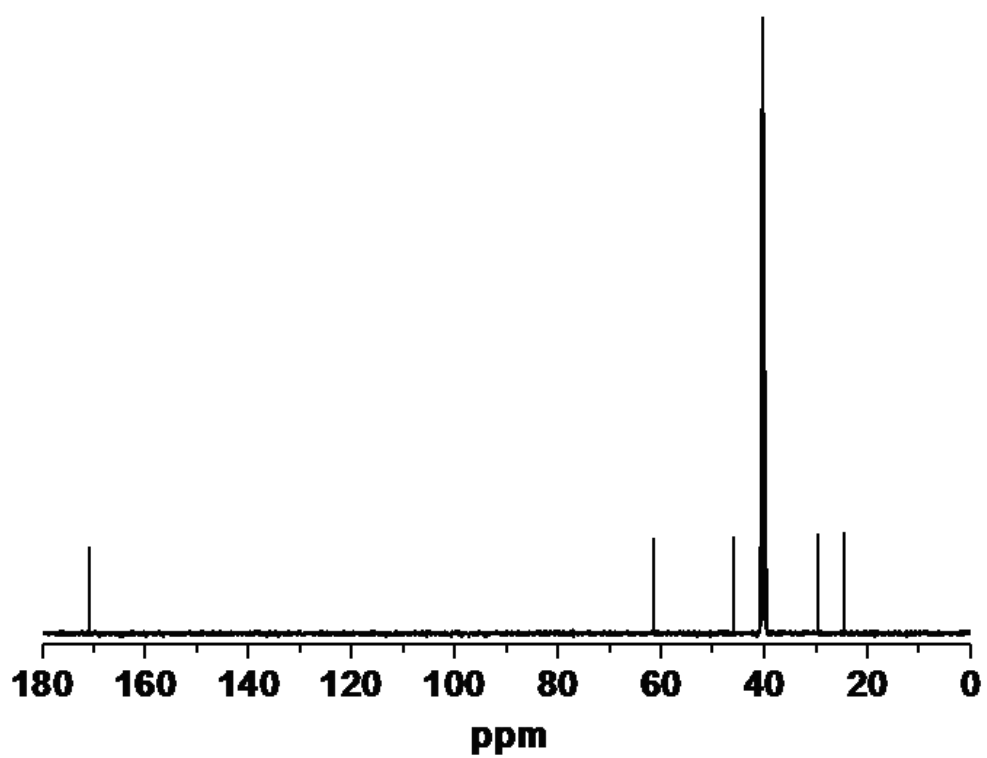

**Fig. S6** The  $^{13}\text{C}$  NMR spectrum of L-proline.

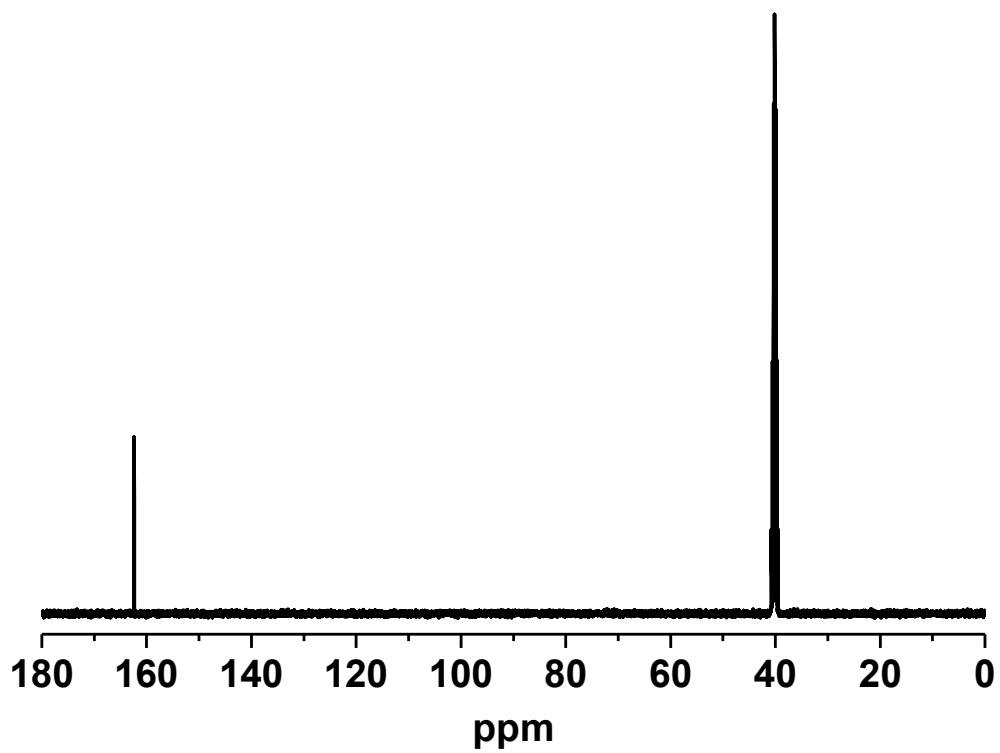

**Fig. S7** The  $^{13}\text{C}$  NMR spectrum of the reaction product.
